# Supplementary material for: In situencapsulated Fe3O4nanosheet arrays with graphene layers as an anode for high-performance asymmetric supercapacitors
Source: Royal Society of Chemistry journal article supplement (doi:10.1039/c7ta07628b), 2017-01-01
Supplement: c7ta07628b1.pdf [file c7ta07628b1.pdf]

Supplementary Information

**In-situ encapsulate Fe<sub>3</sub>O<sub>4</sub> nanosheet arrays with graphene layers as anode for  
high-performance asymmetric supercapacitors**

Jinghuang Lin<sup>1</sup>, Haoyan Liang<sup>1</sup>, Henan Jia<sup>1</sup>, Shulin Chen<sup>1</sup>, Jiale Guo<sup>1</sup>, Junlei Qi<sup>\*1</sup>,  
Chaoqun Qu<sup>2</sup>, Jian Cao<sup>\*1</sup>, Weidong Fei<sup>1</sup> and Jicai Feng<sup>1</sup>

*1. State Key Laboratory of Advanced Welding and Joining, Harbin Institute of  
Technology, Harbin 150001, China*

*2. Key Laboratory of Functional Materials Physics and Chemistry of the Ministry of  
Education, Jilin Normal University, Siping 136000, China*

\*Corresponding authors: Tel. /fax: 86-451-86418146;

E-mail: jlqi@hit.edu.cn (J. Qi)

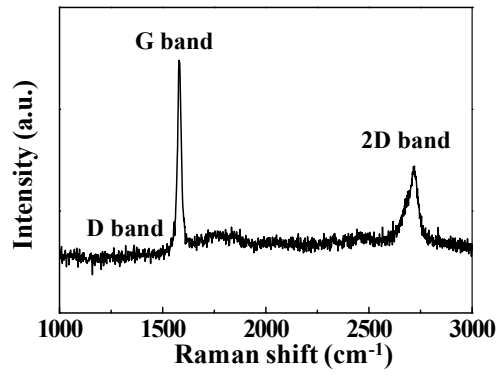

**Fig. S1** Raman spectrum of g-Ni foam.

As shown in Fig. S1, it can be found that the g-Ni foam showed the weak D band at about 1350 cm<sup>-1</sup>. It suggested that the synthesized graphene on Ni foams possessed a high degree of graphitization [53].

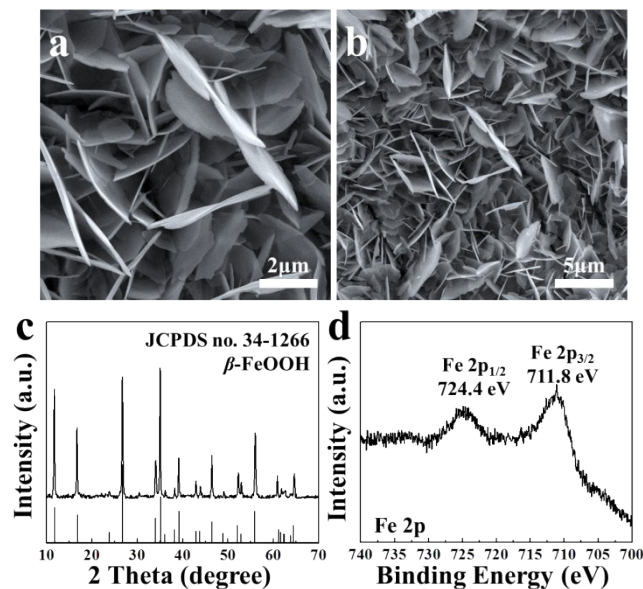

**Fig. S2** (a, b) SEM images, (c) XRD pattern and (d) XPS Fe 2p spectrum of the FeOOH nanosheets.

The SEM images in Fig. S2a and S2b reveal that FeOOH nanosheets were vertically grown on the substrates. The XRD pattern in Fig. S2c confirms these nanosheets consist of  $\beta$ -FeOOH (JCPDS No. 34-1266) [51]. The high-resolution Fe 2p in Fig. S2d also confirm the existence of  $\beta$ -FeOOH [52], which is consistent with XRD results.

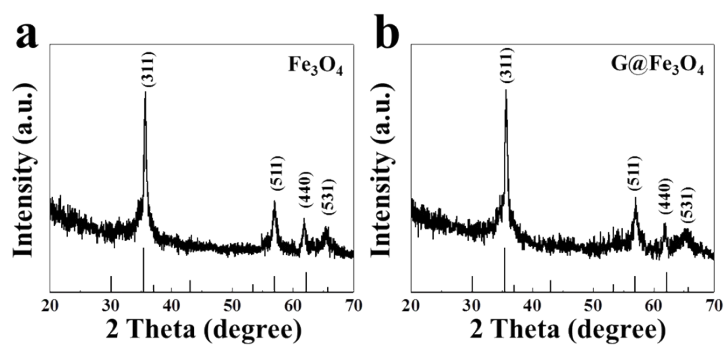

Fig. S3 XRD patterns of (a)  $\text{Fe}_3\text{O}_4$  and (b)  $\text{G@Fe}_3\text{O}_4$  samples separated from the substrates.

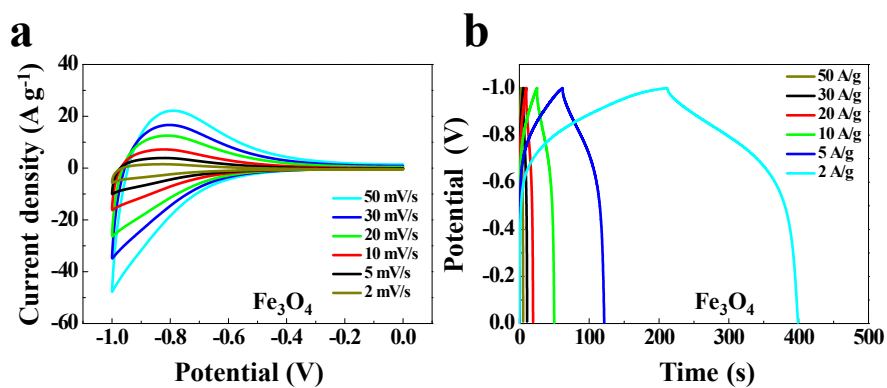

**Fig. S4** (a) CV and (b) GCD curves of  $\text{Fe}_3\text{O}_4$  electrode.

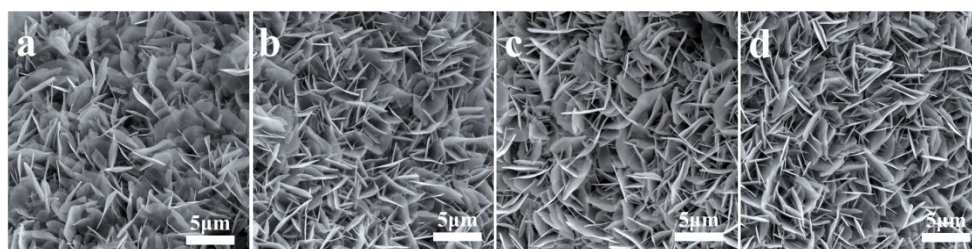

**Fig. S5** SEM images of (a)  $\text{G@Fe}_3\text{O}_4\text{-0.5}$ , (b)  $\text{G@Fe}_3\text{O}_4\text{-1}$ , (c)  $\text{G@Fe}_3\text{O}_4\text{-3}$  and (d)  $\text{G@Fe}_3\text{O}_4\text{-5}$

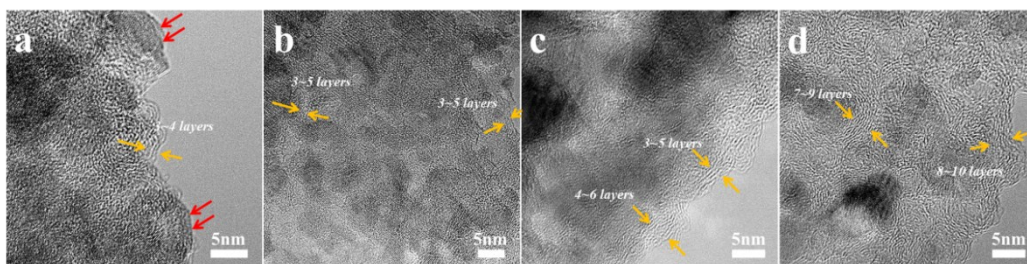

**Fig. S6** HRTEM images of (a) G@Fe<sub>3</sub>O<sub>4</sub>-0.5, (b) G@Fe<sub>3</sub>O<sub>4</sub>-1, (c) G@Fe<sub>3</sub>O<sub>4</sub>-3 and (d) G@Fe<sub>3</sub>O<sub>4</sub>-5.

5

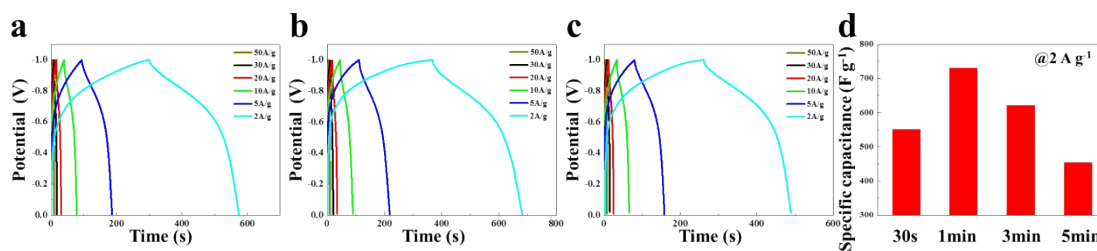

**Fig. S7** GCD curves of (a) G@Fe<sub>3</sub>O<sub>4</sub>-0.5, (b) G@Fe<sub>3</sub>O<sub>4</sub>-3 and (c) G@Fe<sub>3</sub>O<sub>4</sub>-5. (d) The calculated capacitances of G@Fe<sub>3</sub>O<sub>4</sub> with different deposition time at 2 A g<sup>-1</sup>.

In order to optimize the synthetic conditions, we conducted PECVD process for 0.5 min, 1 min, 3 min and 5 min to obtain different samples (briefly named as G@Fe<sub>3</sub>O<sub>4</sub>-0.5, G@Fe<sub>3</sub>O<sub>4</sub>-1, G@Fe<sub>3</sub>O<sub>4</sub>-3 and G@Fe<sub>3</sub>O<sub>4</sub>-5). As shown in Fig. S5, it can be found that G@Fe<sub>3</sub>O<sub>4</sub> samples maintained the nanosheet morphology. Fig. S6a-S6d show the HRTEM images of G@Fe<sub>3</sub>O<sub>4</sub>-0.5, G@Fe<sub>3</sub>O<sub>4</sub>-1, G@Fe<sub>3</sub>O<sub>4</sub>-3 and G@Fe<sub>3</sub>O<sub>4</sub>-5, respectively. As shown in Fig. S6a, it can be found that the G@Fe<sub>3</sub>O<sub>4</sub>-0.5 is covered with about 3~4 layers of graphene. However, some parts of G@Fe<sub>3</sub>O<sub>4</sub>-0.5 are uncovered with graphene (marked with red arrows), which may be due to the short time deposition process. As the deposition time prolong, the graphene layers is gradually increased. It is worth noting that G@Fe<sub>3</sub>O<sub>4</sub>-5 are covered with thick graphene layer (7~10 layers). According to the previous researches [54,55], moderate graphene layers with high crystallinity nature are favorable for improving the electronic conductivity, mechanical properties, and electrochemical performance of G@Fe<sub>3</sub>O<sub>4</sub> samples. Fig. S7a-S7c show the GCD curves of G@Fe<sub>3</sub>O<sub>4</sub>-0.5, G@Fe<sub>3</sub>O<sub>4</sub>-3

6

and G@Fe<sub>3</sub>O<sub>4</sub>-5, respectively. Based on GCD curves, the calculated capacitances are shown in Fig. S7d. It can be found that the maximum capacitance reached to 732 F g<sup>-1</sup> for G@Fe<sub>3</sub>O<sub>4</sub>-1 samples. Thus, we choose the optimized deposition time is 1 min. The long time deposition can lead to the thick graphene layers on Fe<sub>3</sub>O<sub>4</sub>, which would access to a downward trend of specific capacitance of G@Fe<sub>3</sub>O<sub>4</sub> samples. Obviously, encapsulating superabundant graphene layers on Fe<sub>3</sub>O<sub>4</sub> has a negative effect on electrode performance G@Fe<sub>3</sub>O<sub>4</sub>, mainly because of the sacrifice of contact area between Fe<sub>3</sub>O<sub>4</sub> and electrolyte. Undoubtedly, it suggested that moderate graphene layers can improve the electrochemical performances of Fe<sub>3</sub>O<sub>4</sub> samples.

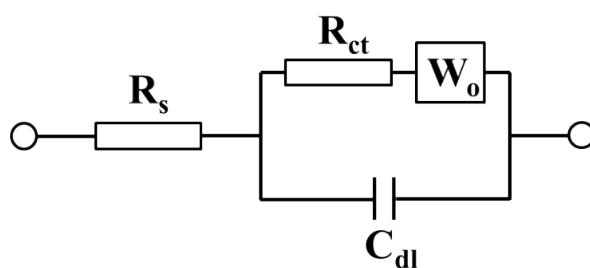

**Fig. S8** The AC impedance equivalent circuit.

As shown in Fig. S8,  $R_{ct}$  represents the charge transfer resistance, which can be estimated by the diameter of the semicircle in the high-frequency region.  $R_s$ ,  $W_o$  and  $C_{dl}$  represent the bulk resistance, Warburg diffusion resistance and double layer

capacitance, respectively [56-58].

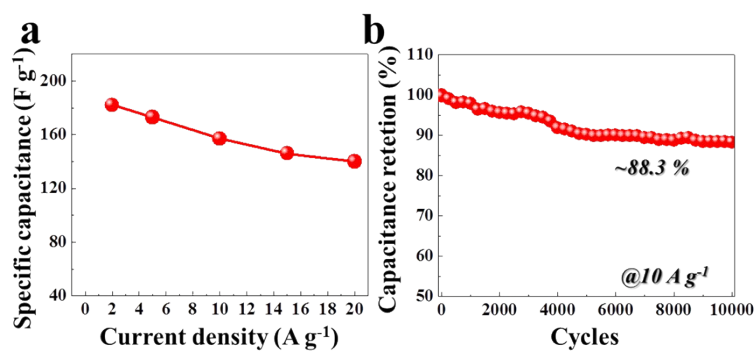

**Fig. S9** (a) The calculated specific capacitance of ASCs. (b) Cycling stability at 10 A g<sup>-1</sup> of ASCs.

**Table S1.** The specific capacitance of various electrodes in the three-electrode system in references

| electrode materials                                      | electrolyte                          | potential window | specific capacitance    | reference |
|----------------------------------------------------------|--------------------------------------|------------------|-------------------------|-----------|
| Fe <sub>3</sub> O <sub>4</sub> nanosheets                | 2 M KOH                              | -1~0 V           | 379.8 F g <sup>-1</sup> | 1         |
| Fe <sub>2</sub> O <sub>3</sub> nanotube                  | 1 M Li <sub>2</sub> SO <sub>4</sub>  | -0.8~0.1 V       | 300.1 F g <sup>-1</sup> | 3         |
| Fe <sub>2</sub> O <sub>3</sub> @C nanoparticles          | 1 M Na <sub>2</sub> SO <sub>4</sub>  | -0.5~0.5 V       | 211.4 F g <sup>-1</sup> | 4         |
| 3D-KSPC/Fe <sub>3</sub> O <sub>4</sub> -DCN              | 2 M KOH                              | -0.8~0.2 V       | 285.4 F g <sup>-1</sup> | 5         |
| Fe <sub>2</sub> O <sub>3</sub> nano-dots@N-dope graphene | 2 M KOH                              | -1.0~0 V         | 274 F g <sup>-1</sup>   | 7         |
| Fe <sub>3</sub> O <sub>4</sub> @FLG/PEDOT:PSS            | 0.5M Na <sub>2</sub> SO <sub>3</sub> | -1.3~-0.4V       | 153 F g <sup>-1</sup>   | 8         |
| hollow and porous Fe <sub>2</sub> O <sub>3</sub>         | 0.5M Na <sub>2</sub> SO <sub>3</sub> | -1.0~-0.1V       | 346 F g <sup>-1</sup>   | 9         |
| NiNTAs@Fe <sub>2</sub> O <sub>3</sub> nanoneedles        | 1 M Na <sub>2</sub> SO <sub>4</sub>  | -0.8-0 V         | 418.7 F g <sup>-1</sup> | 10        |



|                                                                              |                                     |              |                         |           |
|------------------------------------------------------------------------------|-------------------------------------|--------------|-------------------------|-----------|
| particle-exfoliated graphite/Fe <sub>3</sub> O <sub>4</sub>                  | 1 M KOH                             | -1.1~0 V     | 327 F g <sup>-1</sup>   | 11        |
| Fe <sub>3</sub> O <sub>4</sub> /carbon<br>nanotube/polyaniline ternary films | 2 M KOH                             | -0.5~0.5 V   | 201 F g <sup>-1</sup>   | 13        |
| Fe <sub>3</sub> O <sub>4</sub> nanoparticles//rGO                            | 1M KOH                              | -1~0 V       | 241 Fg <sup>-1</sup>    | 14        |
| 3D Fe <sub>3</sub> O <sub>4</sub> /rGO                                       | 2 M KOH                             | -1.0~0.4 V   | 455 F g <sup>-1</sup>   | 15        |
| Fe <sub>3</sub> O <sub>4</sub> /carbon hybrid nanoparticles                  | 1MNa <sub>2</sub> SO <sub>3</sub>   | -0.6~0.3 V   | 455 F g <sup>-1</sup>   | 26        |
| Fe <sub>3</sub> O <sub>4</sub> /carbon nanofibres                            | 3 M KOH                             | -1.05~-0.35V | 225 F g <sup>-1</sup>   | 27        |
| monodisperse Fe <sub>3</sub> O <sub>4</sub><br>nanoparticles/graphene        | 1 M KOH                             | -1~0 V       | 368 F g <sup>-1</sup>   | 28        |
| Fe <sub>3</sub> O <sub>4</sub> /rGO                                          | 1 M LiOH                            | -1.15~0.1 V  | 326 F g <sup>-1</sup>   | 29.       |
| Fe <sub>3</sub> O <sub>4</sub> /CNTs                                         | 6 M KOH                             | -1.0~0 V     | 129 F g <sup>-1</sup>   | 30        |
| Fe <sub>2</sub> O <sub>3</sub> QD/FGS                                        | 1 M Na <sub>2</sub> SO <sub>4</sub> | -1.0~0 V     | 347 F g <sup>-1</sup>   | 31        |
| α-Fe <sub>2</sub> O <sub>3</sub> /graphene                                   | 1 M Na <sub>2</sub> SO <sub>4</sub> | -1.0~0 V     | 504 F g <sup>-1</sup>   | 32        |
| FeOOH quantum dots                                                           | 1 M Li <sub>2</sub> SO <sub>4</sub> | -0.8~0 V     | 365 F g <sup>-1</sup>   | 33        |
| Fe <sub>3</sub> O <sub>4</sub> @Fe <sub>2</sub> O <sub>3</sub> Nanorod       | 1 M Na <sub>2</sub> SO <sub>4</sub> | -1.0~0 V     | 231.9 F g <sup>-1</sup> | 34        |
| Ti-doped<br>Fe <sub>2</sub> O <sub>3</sub> @PEDOT                            | 5 M LiCl                            | -0.8~0 V     | 311.6 F g <sup>-1</sup> | 35        |
| α-Fe <sub>2</sub> O <sub>3</sub> /carbon nanotube<br>sponges                 | 2 M LiCl                            | -1.0~0 V     | 296.3 F g <sup>-1</sup> | 36        |
| G@Fe <sub>3</sub> O <sub>4</sub>                                             | 2 M KOH                             | -1.0~0 V     | 732 F g <sup>-1</sup>   | This work |

**Table S2.** Comparison of the electrochemical performance of as-fabricated ASC device with those in previous reports.

| Asymmetric supercapacitor                                                                | C <sub>cell</sub><br>(F g <sup>-1</sup> ) | Energy<br>density<br>(Wh kg <sup>-1</sup> ) | Corresponding<br>Power density<br>(W kg <sup>-1</sup> ) | Reference |
|------------------------------------------------------------------------------------------|-------------------------------------------|---------------------------------------------|---------------------------------------------------------|-----------|
| Co <sub>2</sub> AlO <sub>4</sub> @MnO <sub>2</sub> //Fe <sub>3</sub> O <sub>4</sub>      | 99.1                                      | 35.25                                       | 800.1                                                   | 1         |
| MnO <sub>2</sub> //Fe <sub>2</sub> O <sub>3</sub> @PPy                                   | 94.2                                      | 42.4                                        | 268.8                                                   | 6         |
| NiNTAs@MnO <sub>2</sub> //NiNTAs@Fe <sub>2</sub> O <sub>3</sub>                          | 95.9                                      | 34.1                                        | 3197.7                                                  | 10        |
| Ni-Co double hydroxide// particle-<br>exfoliated graphite/Fe <sub>3</sub> O <sub>4</sub> | 124.2                                     | 54                                          | 876                                                     | 11        |
| multishelled NiO hollow microspheres//                                                   | 143.4                                     | 51.0                                        | 800                                                     | 12        |

|                                                                                                    |       |      |        |           |
|----------------------------------------------------------------------------------------------------|-------|------|--------|-----------|
| RGO@Fe <sub>3</sub> O <sub>4</sub>                                                                 |       |      |        |           |
| NiCo <sub>2</sub> S <sub>4</sub> //Fe <sub>2</sub> O <sub>3</sub>                                  | 124.8 | 44.4 | 1620   | 16        |
| MoS <sub>2</sub> -NiO//MoS <sub>2</sub> -Fe <sub>2</sub> O <sub>3</sub>                            | 111.4 | 39.6 | 807.2  | 17        |
| NiGa <sub>2</sub> S <sub>4</sub> microspheres//N,S-codoped graphene/Fe <sub>2</sub> O <sub>3</sub> | 123   | 43.6 | 961    | 18        |
| CoMoO <sub>4</sub> @NiMoO <sub>4</sub> ·xH <sub>2</sub> O//Fe <sub>2</sub> O <sub>3</sub>          | 153.6 | 41.8 | 700    | 19        |
| NiCoP nanoplates//graphene film                                                                    | 105.3 | 32.9 | 1301   | 20        |
| oxygen-deficient Co <sub>3</sub> O <sub>4</sub> //AC                                               | 60.3  | 24.2 | 600    | 21        |
| MnCo <sub>2</sub> O <sub>4</sub> @Ni(OH) <sub>2</sub> //AC                                         | 141   | 48   | 1400   | 22        |
| Co <sub>3</sub> O <sub>4</sub> nanosheets//MnO@C nanosheets                                        | 166   | 59.6 | 1529.8 | 23        |
| CNFs@ZnCo <sub>2</sub> O <sub>4</sub> //CNFs                                                       | 139.2 | 49.5 | 222.7  | 24        |
| NiMoO <sub>4</sub> //AC                                                                            | 151.7 | 60.9 | 850    | 25        |
| Ni-Co-S//porous graphene                                                                           | 133   | 60   | 1800   | 37        |
| NiCo <sub>2</sub> S <sub>4</sub> /Ni <sub>3</sub> S <sub>2</sub> //rGO                             | 175   | 62.2 | 800    | 38        |
| ZnCo <sub>2</sub> O <sub>4</sub> @Ni <sub>x</sub> Co <sub>2x</sub> (OH) <sub>6x</sub> //AC         | 65.3  | 26.2 | 511.8  | 39        |
| CuCo <sub>2</sub> O <sub>4</sub> /CuO//RGO/Fe <sub>2</sub> O <sub>3</sub>                          | 93    | 33.0 | 200    | 40        |
| CuCo <sub>2</sub> S <sub>4</sub> //AC                                                              | 124   | 44.1 | 800    | 41        |
| CuCo <sub>2</sub> O <sub>4</sub> /NiO//AC                                                          | 155   | 51.8 | 866    | 42        |
| MnCo-LDH@Ni(OH) <sub>2</sub> //AC                                                                  | 152   | 47.6 | 750.7  | 43        |
| Ni-Co-S/graphene//carbon nanosheets                                                                | 122   | 43.3 | 800    | 44        |
| Meso-NiO/Ni//carbon nanocage                                                                       | 53.7  | 19.1 | 700    | 45        |
| CC@Co <sub>3</sub> O <sub>4</sub> //CC@NC                                                          | 116.8 | 41.5 | 6200   | 46        |
| NiO@FeCo-LDH//pen ink/graphene/carbon nanotube                                                     | 205   | 64.1 | 1500   | 47        |
| MnNi LDH@VG//AC                                                                                    | 160   | 56.8 | 260    | 48        |
| Co(P,S) nanotubes//CC                                                                              | 109.5 | 39   | 800    | 49        |
| onion-like NiCo <sub>2</sub> S <sub>4</sub> particles//AC                                          | 120   | 42.7 | 1583   | 50        |
| H-TiO <sub>2</sub> @Ni(OH) <sub>2</sub> //N-C                                                      | 150.6 | 70.9 | 102.9  | 59        |
| CuCo <sub>2</sub> O <sub>4</sub> //G@Fe <sub>3</sub> O <sub>4</sub>                                | 182   | 82.8 | 2047   | This work |

## References

1. F. Li, H. Chao, X. Liu, J. Jia, C. Xu, F. Dong, Z. Wen, Y. Zhang, *J. Mater. Chem. A* 4 (2016) 2096-2104.
2. C. Guan, J. Liu, Y. Wang, L. Mao, Z. Fan, Z. Shen, H. Zhang, J. Wang, *ACS Nano* 9 (2015) 5198-5207.
3. Y. Liu, Y. Hsu, Y. Lin, Y. Chen, *Electrochim. Acta* 216 (2016) 287-294.
4. M. Zhang, J. Sha, X. Miao, E. Liu, C. Shi, J. Li, C. He, Q. Li, N. Zhao, *J. Alloys Compd.* 696 (2017) 956-963.

5. L. Wang, J. Yu, X. Dong, X. Li, Y. Xie, S. Chen, P. Li, H. Hou, Y. Song, *ACS Sustain. Chem. Eng.* 4 (2016) 1531-1537.
6. P. Tang, L. Han, A. Genç, Y. He, X. Zhang, L. Zhang, J. R. Galán-Mascarós, J. R. Morante, J. Arbiol, *Nano Energy*, 22 (2016) 189-201.
7. L. Liu, J. Lang, P. Zhang, B. Hu, X. Yan, *ACS Appl. Mater. Interfaces* 8 (2016) 9335-9344.
8. E. Pardieu, S. Pronkin, M. Doici, T. Dintzer, B. P. Pichon, D. Begin, C. Pham-Huu, P. Schaaf, S. Begin-Colin, F. Boulmedais, *J. Mater. Chem. A* 3(2015) 22877-22885.
9. C. Fu, A. Mahadevegowda, P.S. Grant, *J. Mater. Chem. A* 4 (2016) 2597-2604.
10. Y. Li, J. Xu, T. Feng, Q. Yao, J. Xie, H. Xia, *Adv. Funct. Mater.* 27 (2017) 1606728.
11. Z. Sun, X. Cai, Y. Song, X. Liu, *J. Power Sources* 359 (2017) 57-63.
12. X.H. Qi, W. J. Zheng, X. Li, G. He, *Sci. Rep.* 6 (2016) 33241.
13. J. Li, W. Lu, Y. Yan, T. Chou, *J. Mater. Chem. A* 5 (2017) 11271-11277.
14. L. Li, P. Gao, S. Gai, F. He, Y. Chen, M. Zhang, P. Yang, *Electrochim. Acta* 190 (2016) 566-573.
15. R. Kumar, R.K. Singh, A.R. Vaz, R. Savu, S.A. Moshkalev, *ACS Appl. Mater. Interfaces* 9 (2017) 8880-8890.
16. H. Fan, W. Liu, W. Shen, *Chem. Eng. J.* 326 (2017) 518-527.
17. K. Wang, J. Yang, J. Zhu, L. Li, Y. Liu, C. Zhang, T. Liu, *J. Mater. Chem. A* 5 (2017) 11236-11245.
18. S. Liu, K.H. Kim, J.M. Yun, A. Kundu, K.V. Sankar, U.M. Patil, C. Ray, S.C. Jun, *J. Mater. Chem. A* 5 (2017) 6292-6298.
19. J. Wang, L. Zhang, X. Liu, X. Zhang, Y. Tian, X. Liu, J. P. Zhao, Y. Li, *Sci. Rep.* 7 (2017) 41088.

20. H. Liang, C. Xia, Q. Jiang, A. N. Gandi, U. Schwingenschlögl, H. N. Alshareef, *Nano Energy* 35 (2017) 331-340.
21. G. Cheng, T. Kou, J. Zhang, C. Si, H. Gao, Z. Zhang, *Nano Energy* 38 (2017) 155-166.
22. Y. Zhao, L. Hu, S. Zhao, L. Wu, *Adv. Funct. Mater.* 26 (2016) 4085-4093.
23. N. Y, K. Guo, W. Zhang, X. Wang, M.Q. Zhu, *J. Mater. Chem. A* 5 (2017) 804-813.
24. H. Niu, X. Yang, H. Jiang, D. Zhou, X. Li, T. Zhang, J.Y. Liu, Q. Wang, F.Y. Qu, *J. Mater. Chem. A* 3 (2017) 24082-24094.
25. S. Peng, L. Li, H.B. Wu, S. Madhavi, X.W. Lou, *Adv. Energy Mater.* 5 (2014) 1401172.
26. J.S. Lee, D.H. Shin, J. Jun, C. Lee, J. Jang, *ChemSusChem* 7 (2014) 1676-1683.
27. C. Fu, A. Mahadevegowda, P.S. Grant, *J. Mater. Chem. A* 3 (2015) 14245-14253.
28. M. Liu, J. Sun, *J. Mater. Chem. A* 2 (2014) 12068-12074.
29. Q. Qu, S. Yang, X. Feng, *Adv. Mater.* 23 (2011) 5574-5580.
30. D. Guan, Z. Gao, W. Yang, J. Wang, Y. Yuan, B. Wang, M. Zhang, L. Liu, *Mater. Sci. Eng.: B* 178 (2013) 736-743.
31. H. Xia, C. Hong, B. Li, B. Zhao, Z. Lin, M. Zheng, S. V. Savilov, S. M. Aldoshin, *Adv. Funct. Mater.* 25 (2015) 627-635.
32. Q.X. Low, G.W. Ho, *Nano Energy* 5 (2014) 28-35.
33. J. Liu, M. Zheng, X. Shi, H. Zeng, H. Xia, *Adv. Funct. Mater.* 26 (2016) 919-930.
34. X. Tang, R. Jia, T. Zhai, H. Xia, *ACS Appl. Mater. Interfaces* 7 (2015) 27518-27525.
35. Y. Zeng, Y. Han, Y. Zhao, Y. Zeng, M. Yu, Y. Liu, H. Tang, Y. Tong, X. Lu, *Adv. Energy Mater.* 5 (2015) 1402176.

36. X. Cheng, X. Gui, Z. Lin, Y. Zheng, M. Liu, R. Zhan, Y. Zhu, Z. Tang, *J. Mater. Chem. A* 3 (2015) 20927-20934.
37. W. Chen, C. Xia, H. N. Alshareef, *ACS Nano* 8 (2014) 9531-9541.
38. W. He, C. Wang, H. Li, X. Deng, X. Xu, T. Zhai, *Adv. Energy Mater.* (2017) 1700983.
39. W. Fu, Y. Wang, W. Han, Z. Zhang, H. Zha, E. Xie, *J. Mater. Chem. A* 4 (2016) 173-182.
40. Y. Wang, C. Shen, L. Niu, R. Li, H. Guo, Y. Shi, C. Li, X. Liu, Y. Gong, *J. Mater. Chem. A* 4 (2016) 9977-9985.
41. S. E. Moosavifard, S. Fani, M. Rahmanian, *Chem. Commun.* 52 (2016) 4517-4520.
42. K. Qiu, M. Liu, Y. Luo, X. Du, *J. Mater. Chem. A* 5 (2017) 5820-5828.
43. S. Liu, S.C. Lee, U. Patil, I. Shackery, S. Kang, K. Zhang, J.H. Park, K.Y. Chung, S.C. Jun, *J. Mater. Chem. A* 5 (2017) 1043-1049.
44. J. Yang, C. Yu, X. Fan, S. Liang, S. Li, H. Huang, Z. Ling, C. Hao, J. Qiu, *J. Mater. Chem. A* 9 (2016) 1299-1307.
45. H. Lai, Q. Wu, J. Zhao, L. Shang, H. Li, R. Che, Z. Lyu, J. Xiong, L. Yang, X. Wang, Z. Hu, *Energy Environ. Sci.* 9 (2016) 2053-2060.
46. C. Guan, W. Zhao, Y. Hu, Z. Lai, X. Li, S. Sun, H. Zhang, A.K. Cheetham, J. Wang, *Nanoscale Horiz.* 2 (2017) 99-105.
47. L. Gao, K. Cao, H. Zhang, P. Li, J. Song, J.U. Surjadi, Y. Li, D. Sun, Y. Lu, *J. Mater. Chem. A* 5 (2017) 16944-16952.
48. W. Guo, C. Yu, S. Li, J. Yang, Z. Liu, C. Zhao, H. Huang, M. Zhang, X. Han, Y. Niu, J. Qiu, *Small* (2017) 1701288.
49. A.M. Elshahawy, C. Guan, X. Li, H. Zhang, Y. Hu, H. Wu, S.J. Pennycook, J.

- Wang, *Nano Energy* 39 (2017) 162-171.
50. B.Y. Guan, L. Yu, X. Wang, S. Song, X.W. Lou, *Adv. Mater.* 29 (2017) 1605051.
51. D. Xiong, X. Wang, W. Li, L. Liu, *Chem. Commun.* 52 (2016) 8711-8714.
52. M. Chen, L. Shen, S. Chen, H. Wang, X. Chen, J. Wang, *J. Mater. Chem. B* 1 (2013) 2582-2589.
53. A. Reina, X. Jia, J. Ho, D. Nezich, H. Son, V. Bulovic, M.S. Dresselhaus, J. Kong, *Nano Lett.* 9 (2009) 30-35.
54. F. Yao, F. Gunes, H. Q. Ta, S. M. Lee, S. J. Chae, K.Y. Sheem, C. S. Cojocaru, S. S. Xie, Y. H. Lee, *J. Am. Chem. Soc.* 134 (2012) 8646-8654.
55. S. Jin, N. Li, H. Cui, C. Wang, *ACS Appl. Mater. Interfaces* 6 (2014) 19397-19404.
56. M. Guo, J. Balamurugan, X. Li, N. H. Kim, J. H. Lee, *Small* 2017, 1701275.
57. Y. Li, J. Xu, T. Feng, Q. Yao, J. Xie, H. Xia, *Adv. Funct. Mater.* 27 (2017) 1606728.
58. J. Chen, J. Xu, S. Zhou, N. Zhao, C. Wong, *Nano Energy* 21 (2016) 145-153.
59. Q. Ke, C. Guan, X. Zhang, M. Zheng, Y. Zhang, W. Cai, H. Zhang, J. Wang, *Adv. Mater.* 29 (2017) 1604164.
